# Supplementary material for: p53/PUMA expression in human pulmonary fibroblasts mediates cell activation and migration in silicosis
Source: PubMed Central journal article supplement (PMC4649630; doi:10.1038/srep16900), 2015-11-18
Supplement: srep16900-s1.pdf [file srep16900-s1.pdf]

## **Supplementary Information**

Manuscript title: p53/PUMA expression in human pulmonary fibroblasts mediates cell activation and migration in silicosis

Authors: Wang, Liu, Dai, Fang, Wang, Zhang, Yao, Zhang, Chao

### **Table of Contents**

|                         |   |
|-------------------------|---|
| Supplementary Figure S1 | 2 |
| Supplementary Figure S2 | 3 |

## Supplementary Figure-S1

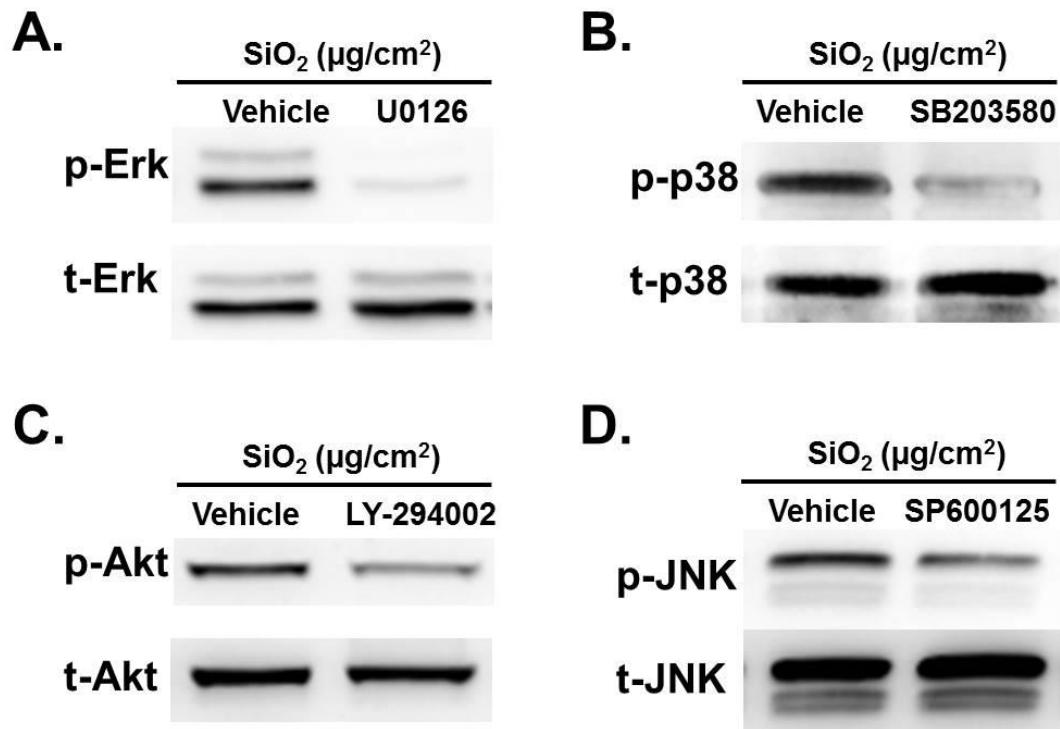

### Sup-Figure-S1

Representative Western blot showing that phosphorylation of MAPKs or PI3K/Akt induced by SiO<sub>2</sub> was abolished by pretreating HPF-a with a corresponding inhibitor of MAPKs or PI3K/Akt. (n=3)

## Supplementary Figure-S2

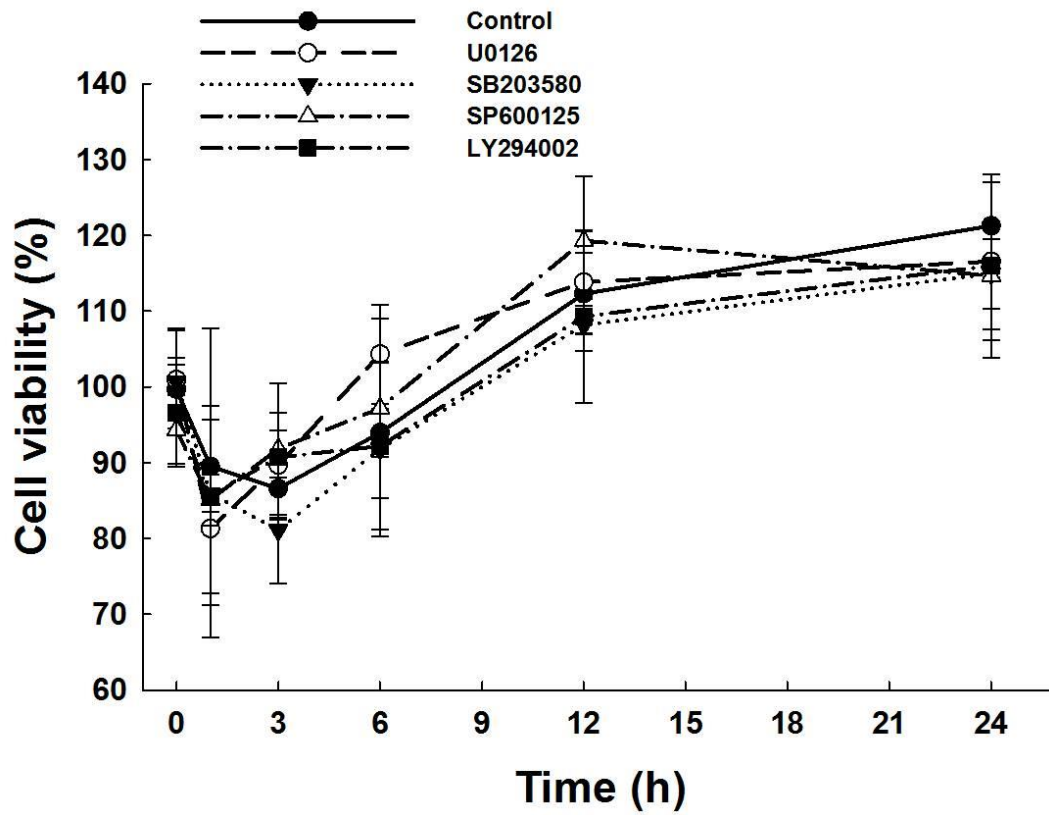

### Sup-Figure-S2

MTT assay showing that inhibitor of MAPKs or PI3K/Akt had no effect on cell viability of HPF-a. (n=5)
